# Supplementary material
Source: publisher site journal article supplement (https://www.dovepress.com/article/214085)
Supplement: Supplementary file 1 [file get_supplementary_file.php]

**Table S1** Motor Nerve conduction parameters

| NERVE | DISTAL LATENCY(ms) | AMPLITUDE(mV) | SEGMENT OR PICK-UP | VELOCITY(m/s) |
| --- | --- | --- | --- | --- |
| Median N. | 4.0 | >5 | Wrist-APB | 50 |
| Ulnar N. | 3.2 | >5 | Wrist- ADQ | 47 |
| Peroneal N | 4.8 | 2 | Ankle-EDB | 45 |
| Tibial N. | 5.4 | >5 | Ankle- AH | 40 |

Sensory Nerve Conduction parameters

| NERVE | PEAK-LATENCY(ms) | AMPLITUDE(μV) | DISTANCE (cm) | VELOCITY(m/s) |
| --- | --- | --- | --- | --- |
| Median N. | <3.5 | >5 | 14 | 51 |
| Ulnar N. | <3.2 | >5 | 14 | 50 |
| Super. Peroneal N. | <3.5 | >2 | 12 | 40 |
| Sural N | <4.4 | >5 | 14 | 40 |

F-Wave Latency

| NREVE | LATENCY(ms) |
| --- | --- |
| Median N. | <31 |
| Ulnar N. | <31 |
| Peroneal N. | <60 |
| Tibial N. | <60 |
